# Supplementary material for: Tonotopy is not preserved in a descending stage of auditory cortex
Source: eLife. 2025 Oct 27;13:RP99989. doi: 10.7554/eLife.99989 (PMC12558652; doi:10.7554/eLife.99989)
Supplement: Source data 1. [file elife-99989-data1.xlsx]

## Sheet: Figure 2G
	Median BF (TR neurons)
	0-200μm	200-400μm	400-600μm	600-800μm	800-1000μm
	2.7	3.6	4.9	7.75	14.2
	4.9	8.9	8.9	4.25	12.1
	3.6	6.6	8.9	19.15	22
	3.6	4.9		12.1	16.3
		6.6		16.3	16.3
				22
				19.15

## Sheet: Figure 2H
	Median BF (CT neurons)
	0-200μm	200-400μm	400-600μm	600-800μm	800-1000μm
	8.9	6.6	12.6	8.9	22
	12.1	3.6	6.6	14.2	4.25
	16.3	2.7	5.75	8.9	16.3
	2.7	6.25	9.95	3.6	12.1
	4.9	10.5	3.6	8.9	10.5
	6.6	12.1	3.6	8.9	8.9
	8.9	3.6	2.8	8.9	3.6
	3.6		5.1	7.75	6.6
	15.45			5.75	4.9
					10.5
					6.6

## Sheet: Figure 2M
TR neurons	Best Frequency(k Hz)	Number of neurons	Fraction of neurons
	2	67	0.139293
	2.7	39	0.0810811
	3.6	64	0.133056
	4.9	31	0.0644491
	6.6	38	0.0790021
	8.9	85	0.176715
	12.1	30	0.0623701
	16.3	39	0.0810811
	22	49	0.101871
	29.6	30	0.0623701
	40	9	0.018711
L6 CT neurons	Best Frequency(k Hz)	Number of neurons	Fraction of neurons
	2	84	0.171079
	2.7	44	0.089613
	3.6	61	0.124236
	4.9	19	0.0386965
	6.6	45	0.0916497
	8.9	68	0.138493
	12.1	36	0.0733198
	16.3	69	0.14053
	22	40	0.0814664
	29.6	8	0.0162933
	40	17	0.0346232

## Sheet: Figure 2N
TR neurons (LF area)	Best Frequency(k Hz)	Number of neurons	Fraction of neurons
	2	9	0.0775862
	2.7	21	0.181034
	3.6	48	0.413793
	4.9	9	0.0775862
	6.6	11	0.0948276
	8.9	16	0.137931
	12.1	0	0
	16.3	0	0
	22	2	0.0172414
	29.6	0	0
	40	0	0
L6 CT neurons (LF area)	Best Frequency(k Hz)	Number of neurons	Fraction of neurons
	2	15	0.153061
	2.7	9	0.0918367
	3.6	14	0.142857
	4.9	2	0.0204082
	6.6	4	0.0408163
	8.9	21	0.214286
	12.1	5	0.0510204
	16.3	13	0.132653
	22	13	0.132653
	29.6	1	0.0102041
	40	1	0.0102041

## Sheet: Figure 2O
TR neurons (LF area)	Best Frequency(k Hz)	Number of neurons	Fraction of neurons
	2	9	0.0989011
	2.7	1	0.010989
	3.6	2	0.021978
	4.9	1	0.010989
	6.6	3	0.032967
	8.9	9	0.0989011
	12.1	19	0.208791
	16.3	13	0.142857
	22	15	0.164835
	29.6	14	0.153846
	40	5	0.0549451
L6 CT neurons (LF area)	Best Frequency(k Hz)	Number of neurons	Fraction of neurons
	2	8	0.0888889
	2.7	9	0.1
	3.6	9	0.1
	4.9	5	0.0555556
	6.6	8	0.0888889
	8.9	12	0.133333
	12.1	7	0.0777778
	16.3	11	0.122222
	22	10	0.111111
	29.6	5	0.0555556
	40	6	0.0666667

## Sheet: Figure 3C
Field IQR (Octave)
TR	CT
1.29	2.58
1.6125	2.365
0.86	2.0425
2.15	3.01
1.6125	2.365
1.29	1.505
0.43	2.6875
1.935	2.58
2.15	1.8275
1.075	0.86
1.29	2.58
2.9025	0.86
1.29	1.505
2.15	1.935
0.43	0.43
0	2.365
2.0425	3.01
1.29	3.01
0.86	3.01
1.3975	1.935
0.43	1.8275
1.72	2.58
1.72	2.15
	0.86
	1.72
	1.1825
	1.505
	1.935
	3.01
	1.29
	1.29
	1.075
	1.8275
	3.1175
	2.58
	0.43
	1.29
	1.075
	1.1825
	2.0425

## Sheet: Figure 3D
Field IQR (Octave)
TR neurons (LF area)	TR neurons (HF area)	L6 CT neurons (LF area)	L6 CT neurons (HF area)
1.29	1.29	2.365	2.0425
0.43	1.075	2.58	3.01
0.43	1.29	2.6875	1.8275
0	0.86	2.15	0.86
	1.3975	1.505	0.86
		1.935	1.8275
		1.075	2.58
		1.8275	1.1825
		1.29	3.1175
			2.58
			0.43

## Sheet: Figure 3G
Local IQR (Octave)
TR neurons (LF area)	TR neurons (HF area)	L6 CT neurons (LF area)	L6 CT neurons (HF area)
0	0.43	0.9675	1.29
0.3225	0.86	0.3225	0.86
0.215	0.43	2.4725	3.01
0.645	1.6125	1.29	0.9675
1.29	0.43	2.15	3.01
0.9675	3.01	0.645	1.29
0.43	3.44	1.72	0.86
0.86	1.935	2.58	3.01
0.9675	0.3225	1.935	0.86
0	3.44	0	0
0.86	2.9025	0.86	1.935
0.3225	1.29	0.645	0
0.43	2.58	0.9675	0.86
0.43	0	2.9025	0.86
2.15	0.9675	1.29	0
1.075	1.72	1.29	1.29
2.15	1.075	0.86
1.29	2.58	0
2.15	1.075	2.15
0.9675	2.15	1.6125
0	1.29
0.43	3.01
0	0
0.9675
0
0.86
0.43
0
0.645
0.645
0.86
0.43
0.86
0.43

## Sheet: Figure 3H
	Local IQR (Octave)
	0-200μm	200-400μm	400-600μm	600-800μm	800-1000μm
	0.43	1.72	0.86	0	3.44
	0.86	0	1.075	0.3225	2.9025
	0.9675	0	0.86	0.645	1.29
	0	0.43	0.86	3.01	2.58
	0.86	1.075	0.5375	3.44	0
	0.3225	0	0	2.9025	0.43
	0.43	0.645	0	2.2575	0.86
	0.43	0.43	2.15	1.72	0.43
	2.15	2.15	0	0.9675	1.6125
	1.075	0.9675	0	0.86	0.43
	2.15	3.44	0.215	1.29	3.01
	1.29	3.01	0	3.01	3.44
	0	1.72	1.29	1.6125	1.935
	0.3225	0.86	0.645	0.9675	0.3225
	0.215	1.29	0	0.645	0.9675
	0.645	3.44	1.29	3.44	1.72
	1.29	1.29	0.86	0	1.075
	0.9675	1.29	0.86	1.29	2.58
	2.15	0		0.86	1.075
	0.9675			0.43	2.15
	0			0.43	1.29
	0.43			1.935	3.01
	0			0	0
	0.9675			0.43
	0			0
	0.86			2.58
	0.43			0
	0			0
	0.645			0
	0.645
	0.86
	0.43

## Sheet: Figure 3I
Δ Frequency (Octave)
TR neurons (LF area)	TR neurons (HF area)	L6 CT neurons (LF area)	L6 CT neurons (HF area)
0	0.43	0	1.29
0	0.43	0.43	1.29
0	0.86	0.43	0.43
0	0.43	3.01	0.43
0	0.86	0	0.43
0	0	0	3.01
0.43	0.43	2.15	3.01
0.43	0	0.86	0
0	0.43	0.86	1.72
0.43	0.86	3.01	2.15
0	1.29	1.72	1.72
0.43	0.43	2.58	2.58
0	0.43	2.15	0.86
0	0.43	1.72	0.43
0	0	1.72	0.86
1.29	1.29	0.43	1.72
1.29	1.29	1.72	1.29
1.72	3.01	0	0
2.15	3.01	2.58	0
0	0.43	1.29	1.29
0.43	0.43	0	0.86
0.86	2.15	0.43	0.86
0.86	2.15	0	0.43
0	3.44	3.87	0.86
0.43	1.29	0.43	0.86
0.86	2.58	0	0.43
0.43	2.58	0	3.01
0.43	0.43	0.86	0
0	2.58	0	0.43
0.43	2.58	0	1.72
0.43	1.29	0	0
0.43	2.15	0	0
0.43	0.43	1.29	0
1.29	0.43	1.29	2.15
0.43	0	0	2.58
0.43	0.43	1.72	2.15
0.43	3.44	2.58	0
0.86	1.29	0.43	3.01
0.86	1.29	0.43	0.43
0.43	1.29	0.43	0.43
0.43	0	0.43	0.43
0.43	0	0	0.43
0.86	1.29	0	0.86
1.29	1.29	0	0.86
1.29	1.29	0.43	0.86
0.86	3.87	2.58	0.86
0.86	2.58	0.86	3.87
2.15	2.58	1.72	2.15
2.15	0.86	1.72	0.86
0	3.44	0.86	0.86
0	0	0.86	0.43
0	3.87	3.01	0
2.15	3.87	0	0
1.29	0.43	3.01	2.15
2.15	0.86	0	0
0.43	3.87	0.43	0
0.43	0	0	1.72
1.29	0.43	0.43	3.01
0.43	0.43	0.86	3.01
0.43	1.29	0.86	1.29
0.43	0.86	1.72	1.29
0.86	0.86	3.44	0.86
0.86	1.29	3.44	2.15
0.86	0.86	0.43	3.44
0.86	1.29	1.72	0
1.29	1.29	1.72	0
0.86	2.58	1.29	1.29
0	2.58	1.29	3.44
0	0.43	1.29	3.44
2.15	1.72	1.29	0
1.29	1.72	1.29	0
1.29	0.86	1.29	1.29
0	0.86	1.72	0.43
0.43	1.72	0	0.86
0.43	1.72	0.86	0.43
0	0.43	0.86	0.43
0.43	3.01	0.86	2.58
0	0.43	0.86	2.58
0	1.72	0.86
2.58	2.15	0
2.15	2.15	0
0	1.29	1.29
0	0.86	1.29
0	0	0.43
0.43	0	1.72
0	3.01	0.43
0.86	3.01	2.15
0	0.86
0	0.86
0	0.43
0	0.86
1.29
0
0
0
0.86
0
0
0
0
0
0
0.86
0.86
0.43
0
0
0
0
0
0.86
0
0
0
0
0

[truncated: 15 more sheets: Figure 3J, Figure 4C, Figure 4D, Figure 4E, Figure 4F, Figure 4G, Figure 4I, Figure 4J, Figure 4L, Figure 4M, Figure 4N, Figure 4O, Figure 4P, S Figure 1, S Figure 2]
